# Supplementary material for: Organ-on-chips made of blood: endothelial progenitor cells from blood reconstitute vascular thromboinflammation in vessel-chips
Source: Royal Society of Chemistry journal article supplement (doi:10.1039/c9lc00469f), 2019-01-01
Supplement: c9lc00469f1.pdf [file c9lc00469f1.pdf]

Electronic Supplementary Information (ESI) available:

**Movie 1.** (Left) Timelapse images of endothelial cells dividing and proliferating within vessel-chips kept inside a cell culture incubator. (Right) Quantification of total microchip area covered by the endothelial cells. The vessel-chip becomes confluent with endothelial lumen within 48 hours of cell seeding.

**Movie 2.** A 3D reconstruction of confocal micrographs of the vessel-on-chip lined with BOECs on all sides of the channel and stained for VE-cadherin and nuclei. Image shows that a BOEC-laden vascular lumen is formed within organ-chips.

**Movie 3.** Time series showing platelet adhesion on BOEC-vessel-chips with or without TNF- $\alpha$  treatment. Each frame is 5 minutes apart but for presentation, the movie runs at two frames per second.
